# Supplementary material for: SCO@SiO2@Au core–shell nanomaterials: enhanced photo-thermal plasmonic effect and spin-crossover properties
Source: Royal Society of Chemistry journal article supplement (doi:10.1039/c4ra10774h), 2014-01-01
Supplement: c4ra10774h1.pdf [file c4ra10774h1.pdf]

*Electronic Supplementary Information*

## **SCO@SiO<sub>2</sub>@Au core-shell nanomaterials: enhanced photo-thermal plasmonic effect and spin-crossover properties**

Dan Qiu,<sup>a</sup> Ling Gu,<sup>a</sup> Xiao-Li Sun,<sup>a</sup> Dong-Hong Ren,<sup>a</sup> Zhi-Guo Gu,<sup>\*a,b</sup> and Zaijun Li<sup>a</sup>

<sup>a</sup> School of Chemical and Material Engineering, Jiangnan University, Wuxi 214122, P. R. China

<sup>b</sup> The Key Laboratory of Food Colloids and Biotechnology, Ministry of Education, School of Chemical and Material Engineering, Jiangnan University, Wuxi 214122, P. R. China

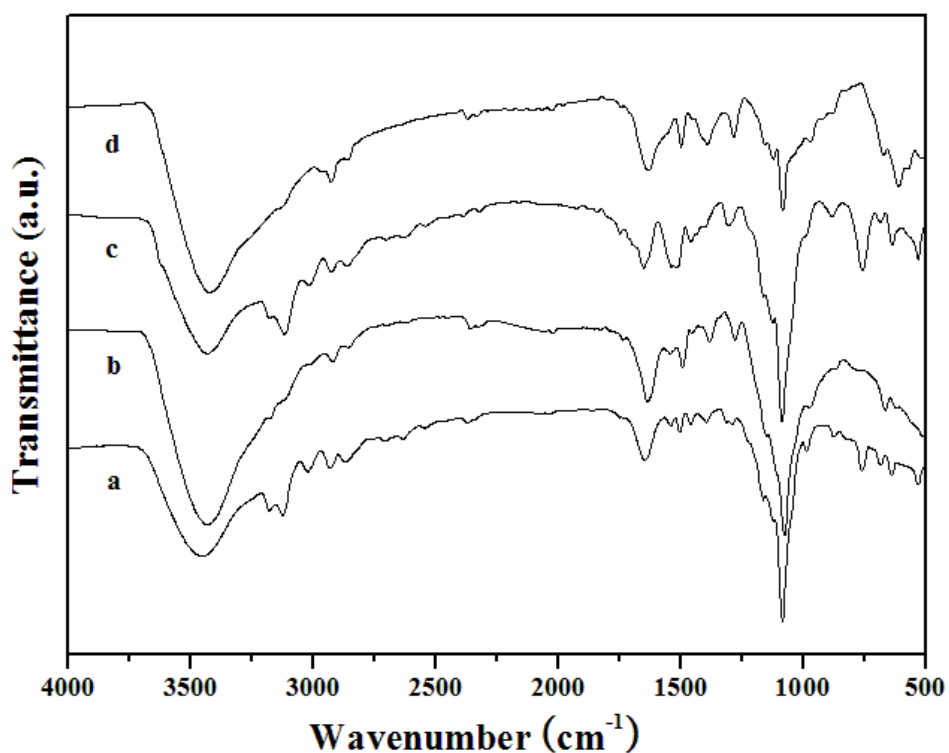

**Fig. S1** FT-IR spectra of as-prepared SCO@SiO<sub>2</sub>-1 (a), SCO@SiO<sub>2</sub>-2 (c), SCO@SiO<sub>2</sub>@Au-1 (b) and SCO@SiO<sub>2</sub>@Au-2 (d).

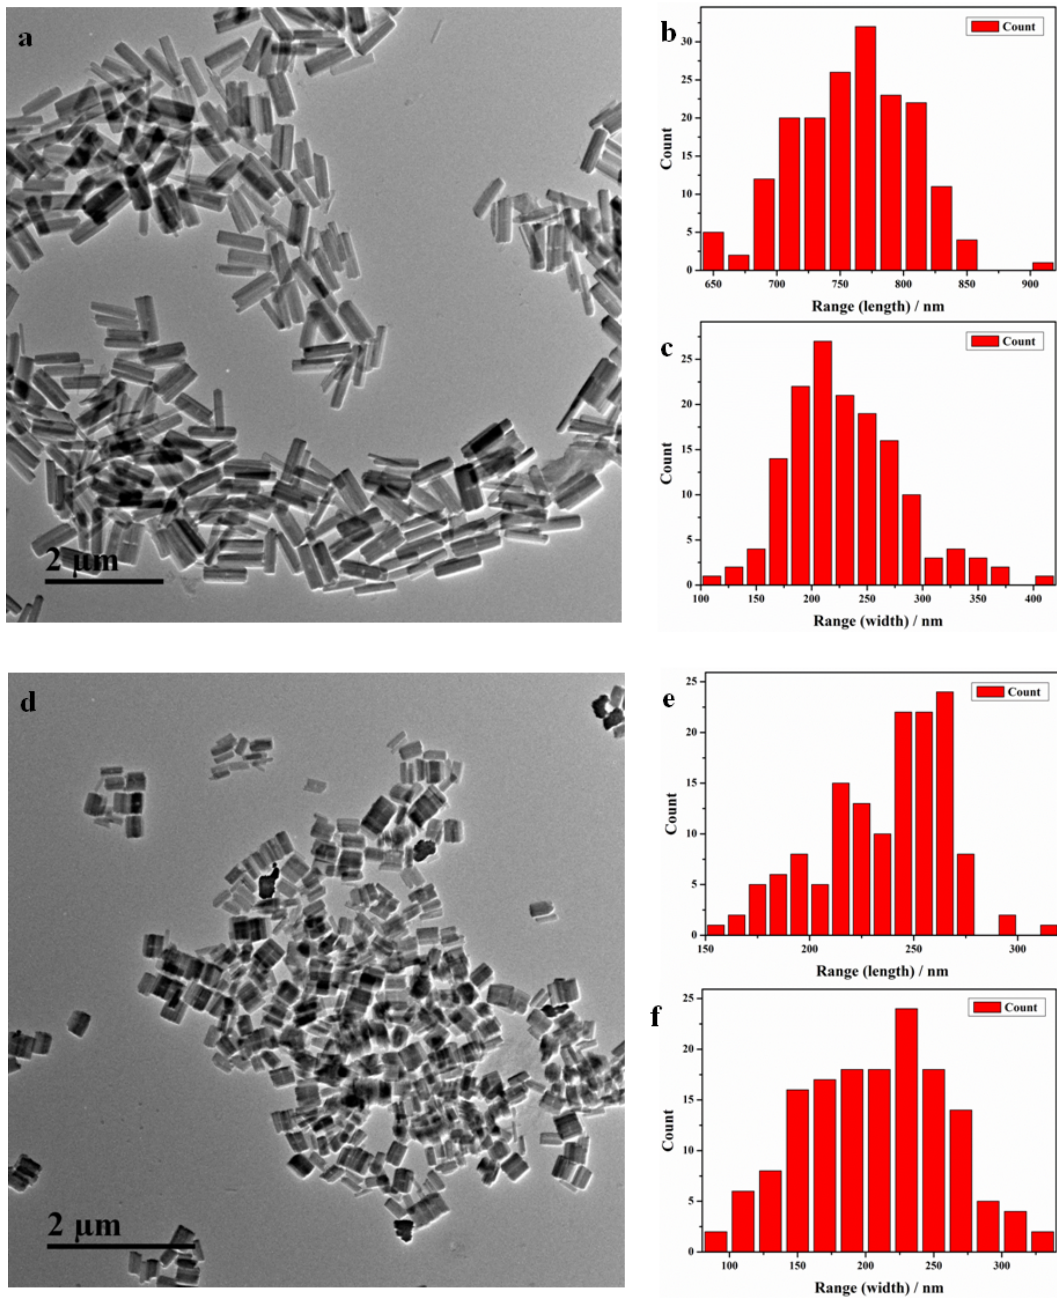

| Obtained mean dimensions | Length (nm) | Width (nm) |
|--------------------------|-------------|------------|
| SCO@SiO <sub>2</sub> -1  | 760         | 230        |
| SCO@SiO <sub>2</sub> -2  | 230         | 200        |

**Fig. S2** TEM images as-prepared SCO@SiO<sub>2</sub>-1 (a), SCO@SiO<sub>2</sub>-2 (d). Size distribution histogram and statistics of SCO@SiO<sub>2</sub>-1 (b, c), SCO@SiO<sub>2</sub>-2 (e, f).

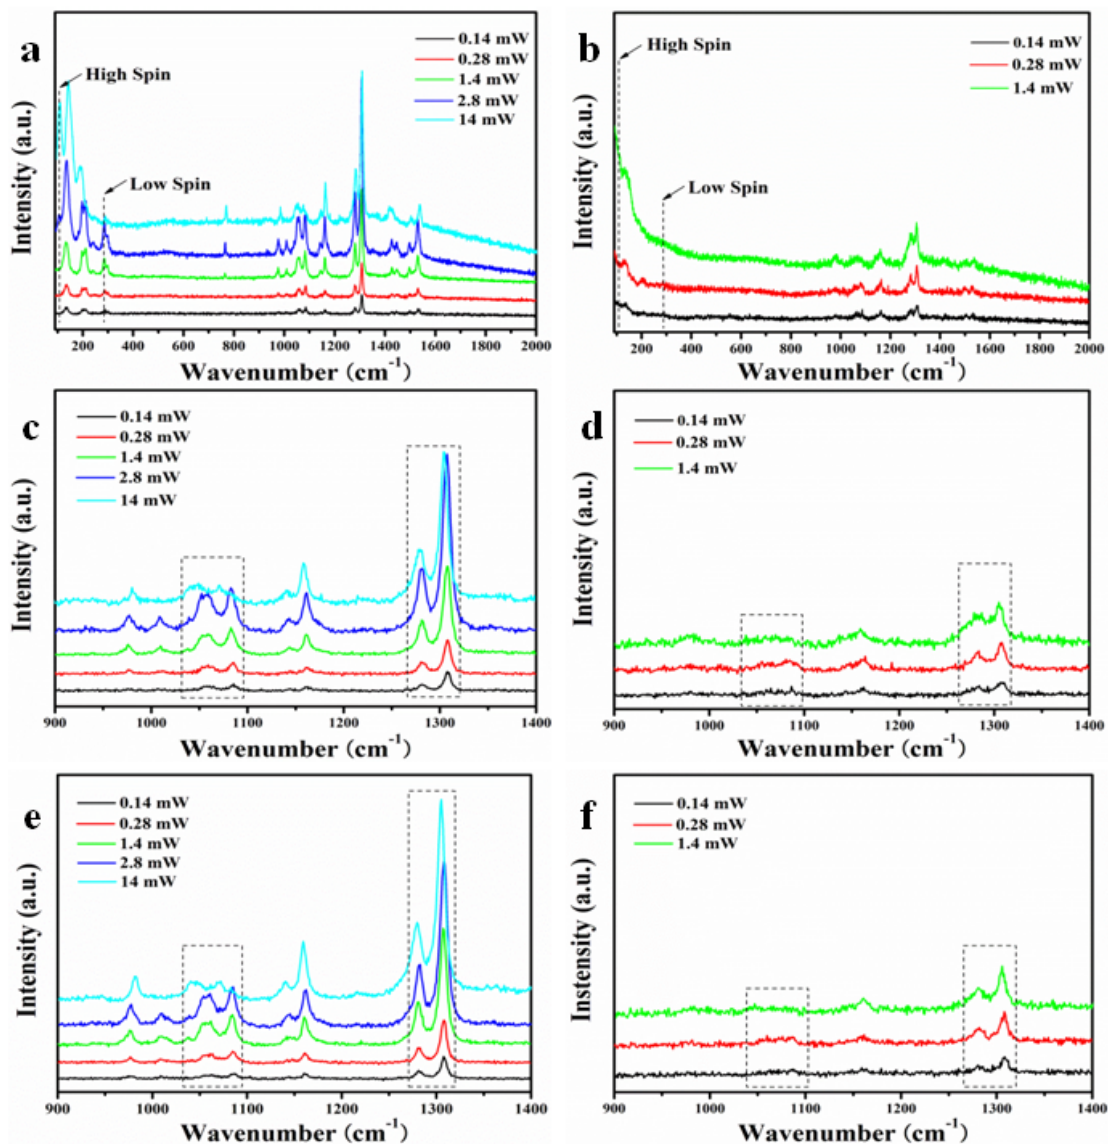

**Fig. S3** Raman spectra of as-prepared SCO@SiO<sub>2</sub>-2 (a), SCO@SiO<sub>2</sub>@Au-2 (b). Magnified Raman spectra of SCO@SiO<sub>2</sub>-2 (c), SCO@SiO<sub>2</sub>@Au-2 (d), SCO@SiO<sub>2</sub>-1 (e), SCO@SiO<sub>2</sub>@Au-1 (f) with a range of 900-1400 cm<sup>-1</sup>.

(a)

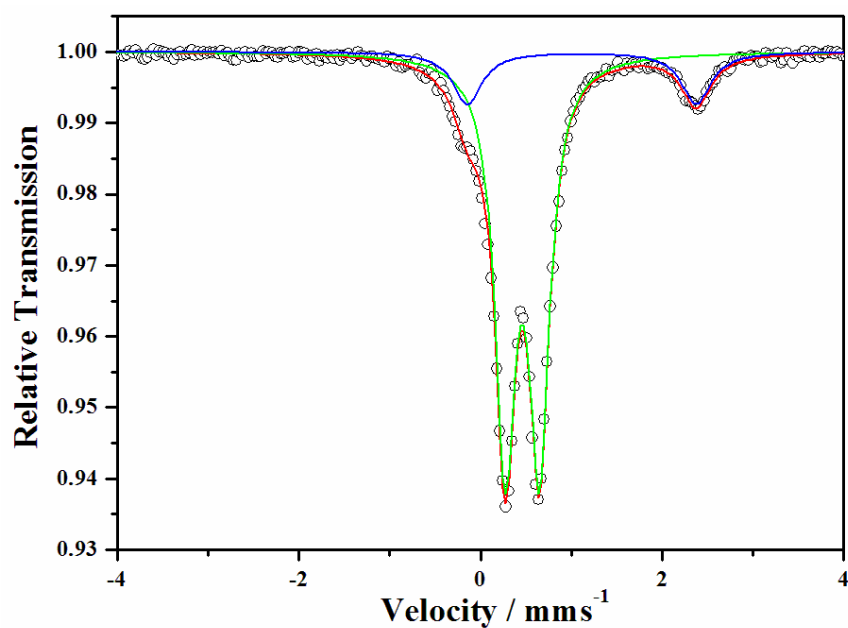

| I.S. | Q.S. | fwhm | d[%] | rel_I. [%] |
|------|------|------|------|------------|
| 0.46 | 0.38 | 0.27 | 5.57 | 84.40      |
| 1.12 | 2.52 | 0.39 | 0.73 | 15.60      |

(b)

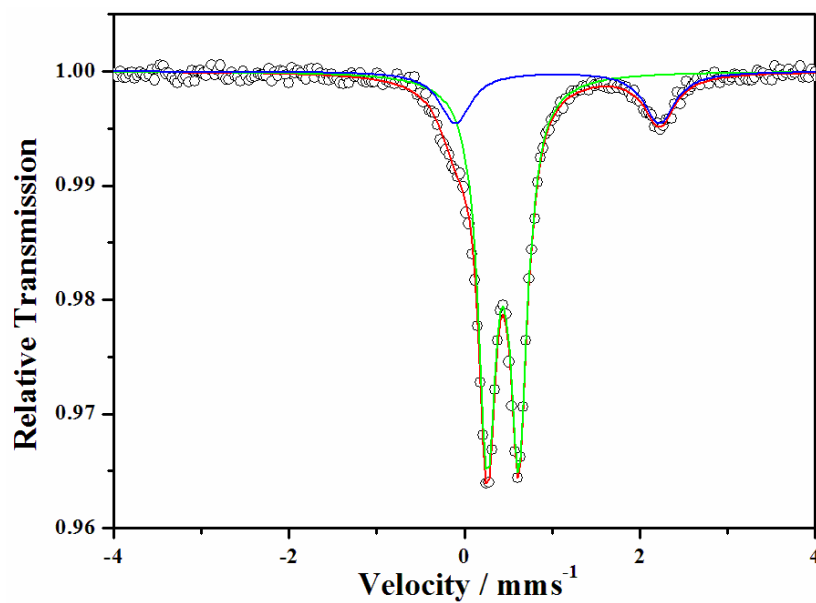

| I.S. | Q.S. | fwhm | d[%] | rel_I. [%] |
|------|------|------|------|------------|
| 0.44 | 0.36 | 0.25 | 3.18 | 80.52      |
| 1.06 | 2.33 | 0.43 | 0.45 | 19.48      |

**Fig. S4** Mössbauer spectra of SCO@SiO<sub>2</sub>-1 (a), SCO@SiO<sub>2</sub>-2 (b) at 300 K.
